# Supplementary material for: Exploring the Capability of HAADF-STEM Techniques to Characterize Graphene Distribution in Nanocomposites by Simulations
Source: Hindawi journal article supplement (doi:10.1155/2018/4906746), 2018-12-16
Supplement: f1 [file 4906746.f1.zip]

Archive with 2 entries (2 files):
- RECONSTRUCCIO╠üN 3D.wmv
- PROYECCIONES 2D.avi
